# Supplementary material for: Quantitative Magnetic Resonance Imaging in Perianal Crohn’s Disease at 1.5 and 3.0 T: A Feasibility Study
Source: MDPI journal article supplement (doi:10.3390/diagnostics11112135), 2021-11-17
Supplement: s1 [file s1]

## Supplementary Materials

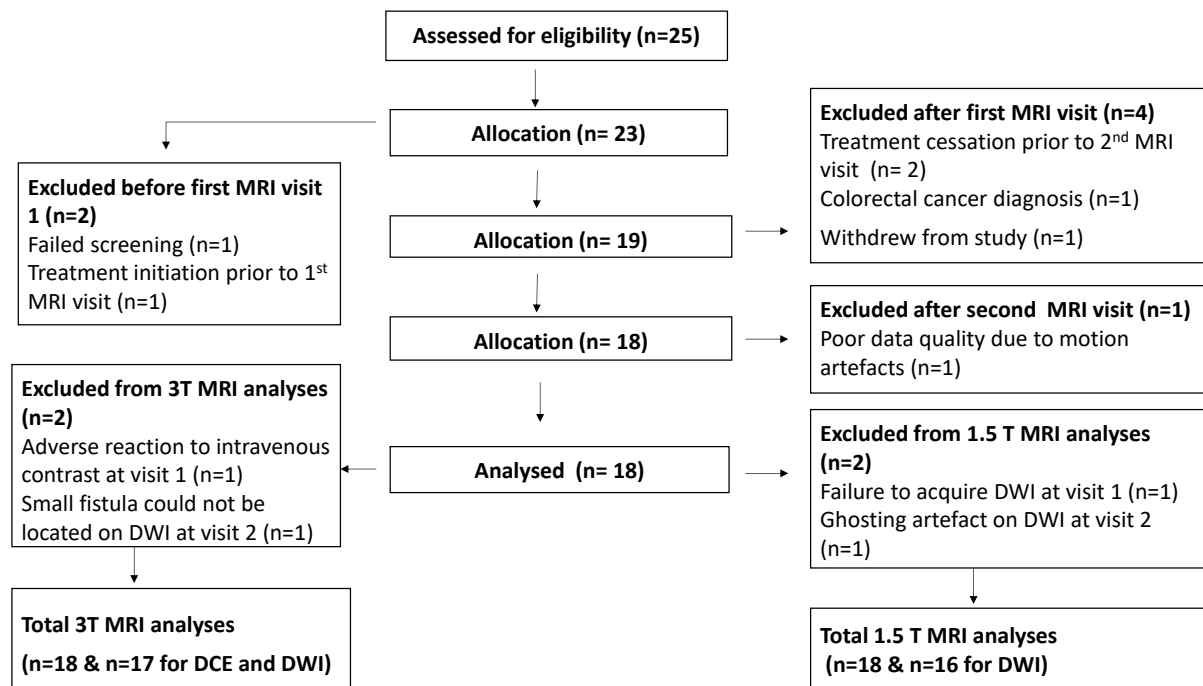

**Figure S1.** Consort Diagram for MAP study.

**Table S1.** Participants demographic and clinical data for all subjects included in the MRI analysis.

| Patient No. | Age (Years) | Sex | PDAI Visit 1 | PDAI Visit 2 | CRP Visit 1 | CRP Visit 2 | VAS Visit 1 | VAS Visit 2 | Rectal Involvement | Fistula Complexity | Disease Location | H/O Surgery | Stoma | RV | Fistula |
|-------------|-------------|-----|--------------|--------------|-------------|-------------|-------------|-------------|--------------------|--------------------|------------------|-------------|-------|----|---------|
| 1           | 27          | M   | 5            | 4            | 10          | 5           | 9           | 11          | No                 | Complex            | 2                | No          | No    | No | No      |
| 2           | 24          | M   | 8            | 0            | 47          | 5           | 22          | 7           | Yes                | Complex            | 2                | Yes         | No    | No | No      |
| 3           | 40          | F   | 6            | 7            | 5           | 5           | 7           | 7           | No                 | Simple             | 3                | No          | No    | No | No      |
| 5           | 37          | F   | 7            | 4            | 5           | 5           | 7           | 9           | No                 | Simple             | 2                | No          | No    | No | No      |
| 6           | 45          | F   | 8            | 2            | 12          | 5           | 22          | 11          | Yes                | Complex            | 2                | No          | No    | No | No      |
| 7           | 38          | F   | 5            | 3            | 6           | 5           | 8           | 13          | No                 | Simple             | 3                | No          | No    | No | No      |
| 8           | 23          | M   | 6            | 5            | 27          | 5           | 20          | 14          | Yes                | Complex            | 1                | No          | No    | No | No      |
| 9           | 27          | M   | 11           | 8            | 5           | 5           | 15          | 7           | Yes                | Simple             | 2                | No          | No    | No | No      |
| 11          | 52          | F   | 11           | 1            | 74          | 5           | 14          | 7           | Yes                | Simple             | 3                | No          | No    | No | No      |
| 12          | 64          | F   | 14           | 10           | 22          | 5           | 16          | 13          | Yes                | Complex            | 3                | Yes         | Yes   | No | No      |

|    |    |   |    |    |    |    |    |    |     |         |   |     |     |     |
|----|----|---|----|----|----|----|----|----|-----|---------|---|-----|-----|-----|
| 13 | 49 | M | 11 | 4  | 20 | 5  | 13 | 12 | No  | Complex | 3 | Yes | No  | No  |
| 14 | 53 | F | 14 | 9  | 15 | 8  | 22 | 14 | Yes | Complex | 3 | Yes | Yes | Yes |
| 15 | 33 | F | 8  | 4  | 8  | 5  | 20 | 11 | Yes | Complex | 2 | No  | No  | No  |
| 16 | 39 | F | 7  | 3  | 5  | 5  | 16 | 12 | Yes | Simple  | 1 | Yes | No  | Yes |
| 17 | 52 | F | 8  | 6  | 26 | 5  | 13 | 10 | No  | Complex | 2 | No  | No  | No  |
| 18 | 18 | F | 6  | 2  | 2  | 1  | 7  | 18 | No  | Simple  | 3 | No  | No  | No  |
| 19 | 39 | F | 9  | 10 | 20 | 26 | 22 | 22 | Yes | Complex | 3 | No  | No  | No  |
| 20 | 29 | F | 8  | 9  | 1  | 1  | 17 | 19 | no  | Simple  | 3 | Yes | No  | No  |

VAS: Van Assche Score; RV: Recto-vaginal.

Individual Data Plots before and 12 weeks after treatment.

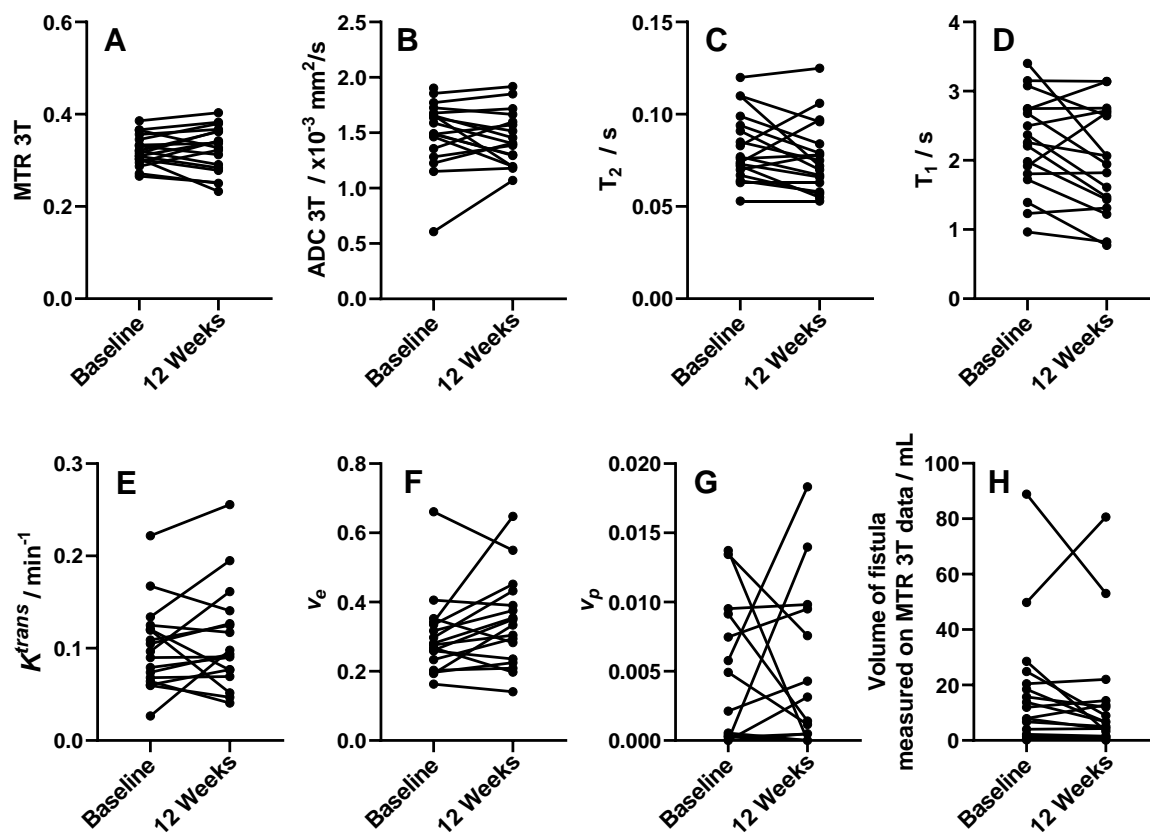

**Figure S2.** Individual data plots for 3T parameters measured before (Baseline) and after 12 weeks of treatment in the diseased tissue. (A) MTR, (B) ADC, (C) T2, (D) T1, (E)  $K^{trans}$ , (F)  $v_e$ , (G)  $v_p$  (H) Fistula volume measured from MTR data.

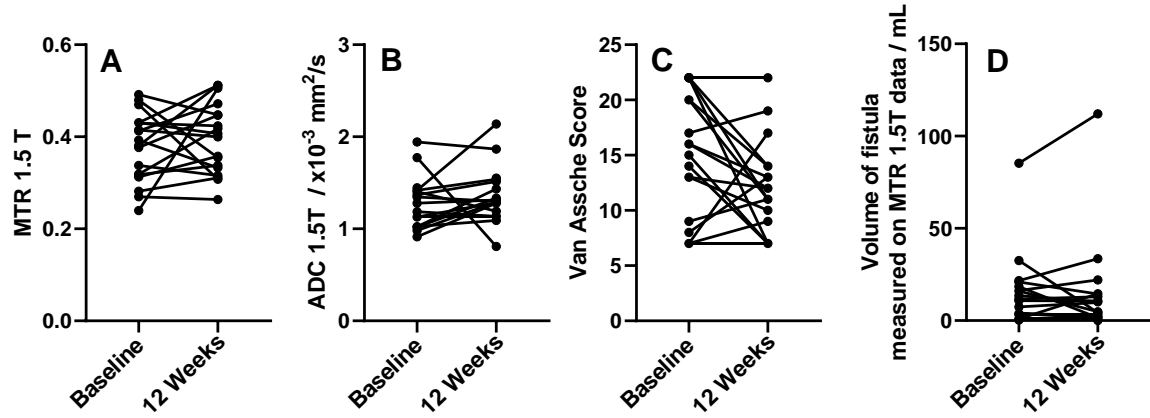

**Figure S3.** Individual data plots for 1.5T parameters measured before (Baseline) and after 12 weeks of treatment in the diseased tissue. (A) MTR, (B) ADC, (C) Van Assche Score, (D) Fistula volume measured from MTR data.

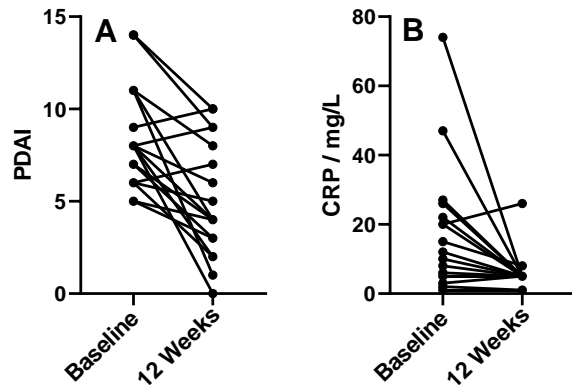

**Figure S4.** Individual data plots for clinical parameters measured before (Baseline) and after 12 weeks of treatment. (A) PDAI score, (B) CRP.

**Table S2.** MRI Parameters Pearson Correlation Coefficient  $r$ .

| 3T MRI Parameter Correlation |                         |                         |                             |                          |                        |                         |                        |
|------------------------------|-------------------------|-------------------------|-----------------------------|--------------------------|------------------------|-------------------------|------------------------|
|                              | ADC 3T<br>♦             | T <sub>2</sub>          | T <sub>1</sub> <sup>*</sup> | $K^{trans}$ <sup>*</sup> | $v_e$ <sup>*</sup>     | $v_p$ <sup>*</sup>      | VAS                    |
| MTR 3T                       | -0.51<br>-0.72 to -0.21 | -0.59<br>-0.77 to -0.33 | 0.09<br>-0.25 to 0.42       | -0.66<br>-0.82 to 0.42   | -0.34<br>-0.61 to 0.00 | -0.52<br>-0.73 to -0.22 | -0.30<br>-0.57 to 0.03 |
| ADC 3T<br>♦                  |                         | 0.35<br>0.02 to 0.61    | 0.32<br>-0.02 to 0.60       | 0.17<br>-0.19 to 0.48    | -0.09<br>-0.42 to 0.27 | 0.11<br>-0.24 to 0.44   | 0.22<br>-0.12 to 0.52  |
| T <sub>2</sub>               |                         |                         | 0.53<br>0.23 to 0.73        | 0.16<br>-0.19 to 0.47    | -0.19<br>-0.50 to 0.16 | 0.19<br>-0.16 to 0.50   | 0.58<br>0.32 to 0.77   |
| T <sub>1</sub> <sup>*</sup>  |                         |                         |                             | N/A                      | N/A                    | N/A                     | 0.33<br>-0.01 to 0.60  |
| $K^{trans}$ <sup>*</sup>     |                         |                         |                             |                          | N/A                    | N/A                     | 0.11<br>-0.24 to 0.43  |
| $v_e$ <sup>*</sup>           |                         |                         |                             |                          |                        | N/A                     | -0.14<br>-0.46 to 0.21 |

|                                 |               |                |               |
|---------------------------------|---------------|----------------|---------------|
| $v_p^*$                         |               |                | 0.23          |
|                                 |               |                | -0.12 to 0.52 |
| 1.5 T MRI Parameter Correlation |               |                |               |
|                                 | ADC           | VAS            |               |
|                                 | 1.5T*         |                |               |
| MTR 1.5T                        | -0.11         | -0.55          |               |
|                                 | -0.44 to 0.23 | -0.74 to -0.27 |               |
| ADC 1.5T                        |               | 0.00           |               |
| *                               |               | -0.33 to 0.34  |               |

♦ n = 35, \* n = 34, \*\*combined n = 33, for the rest of the data n=36. 95% confidence intervals for the Pearson Correlation coefficient r, are shown in light grey shading. As  $K^{trans}$ ,  $v_e$  and  $v_p$  were all derived from the same dataset which included the T<sub>1</sub> data, these parameters were not assessed for cross-correlation.
